# Supplementary material for: NF-κB p65 Subunit Is Modulated by Latent Transforming Growth Factor-β Binding Protein 2 (LTBP2) in Nasopharyngeal Carcinoma HONE1 and HK1 Cells
Source: PubMed Central journal article supplement (PMC4431814; doi:10.1371/journal.pone.0127239), 2015-05-14
Supplement: pone.0127239.s004.pdf [file pone.0127239.s004.pdf]

| shRNA   | TRC clone number | Region | Target sequence (5' to 3') |
|---------|------------------|--------|----------------------------|
| p65 sh  | TRCN0000014684   | CDS    | CGGATTGAGGAGAAACGTAAA      |
| IκBα sh | TRCN0000004540   | CDS    | GCAGCAGACTCCACTCCACTT      |

**Supplementary Table S1: shRNA oligonucleotide sequences**
