# Supplementary material for: NF-κB p65 Subunit Is Modulated by Latent Transforming Growth Factor-β Binding Protein 2 (LTBP2) in Nasopharyngeal Carcinoma HONE1 and HK1 Cells
Source: PubMed Central journal article supplement (PMC4431814; doi:10.1371/journal.pone.0127239), 2015-05-14
Supplement: pone.0127239.s005.pdf [file pone.0127239.s005.pdf]

| Antibody name         | Source                          | Catalog number | Host   | Dilution | Size (kDa) |
|-----------------------|---------------------------------|----------------|--------|----------|------------|
| p-p65 (Ser536)        | Cell Signaling Technology Inc.  | 3033           | Rabbit | 1:1000   | 65         |
| p65                   | Cell Signaling Technology Inc.  | 8242           | Rabbit | 1:1000   | 65         |
| p84                   |                                 | GTX70220       | Mouse  | 1:2000   | 84         |
| IκBα                  | Cell Signaling Technology Inc.  | 4814           | Mouse  | 1:500    | 40         |
| p-IκBα (Ser32/36)     | Cell Signaling Technology Inc.  | 5210           | Rabbit | 1:1000   | 40         |
| IKKα                  | Cell Signaling Technology Inc.  | 2682           | Rabbit | 1:1000   | 85         |
| IKKβ                  | Cell Signaling Technology Inc.  | 8943           | Rabbit | 1:1000   | 87         |
| p-IKKα/β (Ser176/180) | Cell Signaling Technology Inc.  | 2697           | Rabbit | 1:1000   | 85-87      |
| LTBP2                 | Provided by Dr Marko Hyytiainen | -              | Rabbit | 1:1000   | 240        |
