# Supplementary material for: NF-κB p65 Subunit Is Modulated by Latent Transforming Growth Factor-β Binding Protein 2 (LTBP2) in Nasopharyngeal Carcinoma HONE1 and HK1 Cells
Source: PubMed Central journal article supplement (PMC4431814; doi:10.1371/journal.pone.0127239), 2015-05-14
Supplement: pone.0127239.s006.pdf [file pone.0127239.s006.pdf]

| Primer name       | Sequencing (5' to 3')                                | Product size (bp) | Anneal temp (°C) |
|-------------------|------------------------------------------------------|-------------------|------------------|
| <i>IL6</i>        | GCAAAGAGGGCACTGGCAGAA<br>GGCAAGTCTCCTCATTGAATCC      | 93                | 60               |
| <i>IL8</i>        | GGCCGTGGCTCTCTTGGCAG<br>GCACCCAGTTTTCTTGGGGTCC       | 242               | 60               |
| <i>VEGF165</i>    | TGTGAATGCAGACCAAAGA<br>TGCTTTCTCCGCTCTGAGC           | 74                | 60               |
| <i>VEGF189</i>    | CGCAAGAAATCCCGTATAAGT<br>TGCTTTCTCCGCTCTGAGC         | 65                | 60               |
| <i>Total VEGF</i> | ACTGCCATCCAATCGAGACC<br>GATGGCTTGAAGATGTA CTGATCT    | 76                | 60               |
| <i>ANG</i>        | TGTCCTGCCCGTTTCTGCGG<br>CCGGCCCTGTGGTTTGGCAT         | 191               | 60               |
| <i>PDGFB</i>      | ATCGCTGCTGGGCGCTCTTC<br>TCTCCGTGCAGCAGGCGTTG         | 148               | 60               |
| <i>RANTES</i>     | GGCAGCCCTCGCTGTCATCC<br>GGCAGTGGGCGGGCAATGTA         | 114               | 60               |
| <i>RELA</i>       | TCATGAAGAAGAGTCCTTT CAGC<br>GGATGACGTAAAGGGATAGGG    | 128               | 60               |
| <i>NFKBIA</i>     | TCCTCAACTTCCAGAACAACC<br>CTCGGAGCTCAGGATCACA         | 114               | 60               |
| <i>LTBP2</i>      | CTGAACACTGTGAACGGACAG<br>CAGCAGTCCTCCTGGGTAGT        | 65                | 60               |
| <i>TWIST</i>      | GGAGTCCGCAGTCTTACGAG<br>TCTGGAGGACCTGGTAGAGG         | 201               | 60               |
| <i>MMP3</i>       | CAAAACATATTTCTTTGTAGAGGACAA<br>TTCAGCTATTTGCTTGGGAAA | 91                | 60               |
| <i>SOX9</i>       | AGCCCCAGCCACTACAGCGA<br>CGGGTGATGGGCGGGTAGGA         | 104               | 60               |
| <i>ICAM</i>       | AACCTCAGCCTCGCTATGG<br>GATGACTTTTGAGGGGGACA          | 126               | 60               |
| <i>EGFR</i>       | CTATGTGCAGAGGAATTATGATCTTT<br>GAGGGCAATGAGGACATAACC  | 76                | 60               |
| <i>FN</i>         | CAGTGGGAGACCTCGAGAAG<br>TCCCTCGGAACATCAGAAAC         | 168               | 60               |
| <i>GAPDH</i>      | GAAGGTGAAGGTGGAGTC<br>GAAGATGGTGATGGGATTC            | 220               | 60               |

**Supplementary Table S3: Gene-specific primers used in the study**
